# Supplementary material for: Targeted Cell Fusion Facilitates Stable Heterokaryon Generation In Vitro and In Vivo
Source: PubMed Central journal article supplement (PMC3200330; doi:10.1371/journal.pone.0026381), 2011-10-24

**A**

| Expt #  | NCAM+ Heterokaryons |
|---------|---------------------|
| 1       | 28/33 (85%)         |
| 2       | 25/33 (76%)         |
| 3       | 31/33 (94%)         |
| Average | 85% +/- 9%          |

**B**

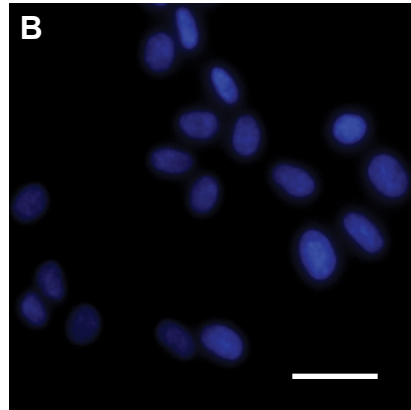

**C**

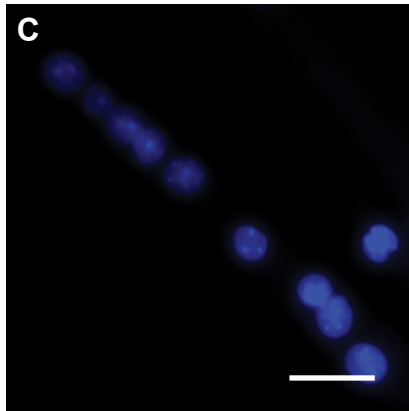

**D**

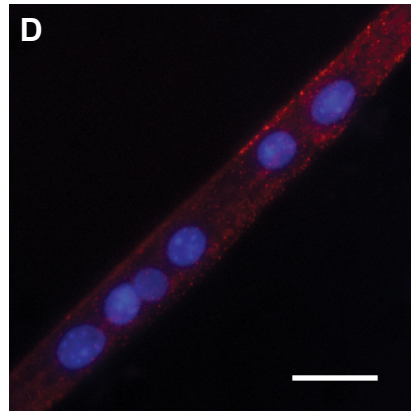

Supplement: pone.0026381.s001.pdf [file pone.0026381.s001.pdf]
