# Supplementary material for: Targeted Cell Fusion Facilitates Stable Heterokaryon Generation In Vitro and In Vivo
Source: PubMed Central journal article supplement (PMC3200330; doi:10.1371/journal.pone.0026381), 2011-10-24

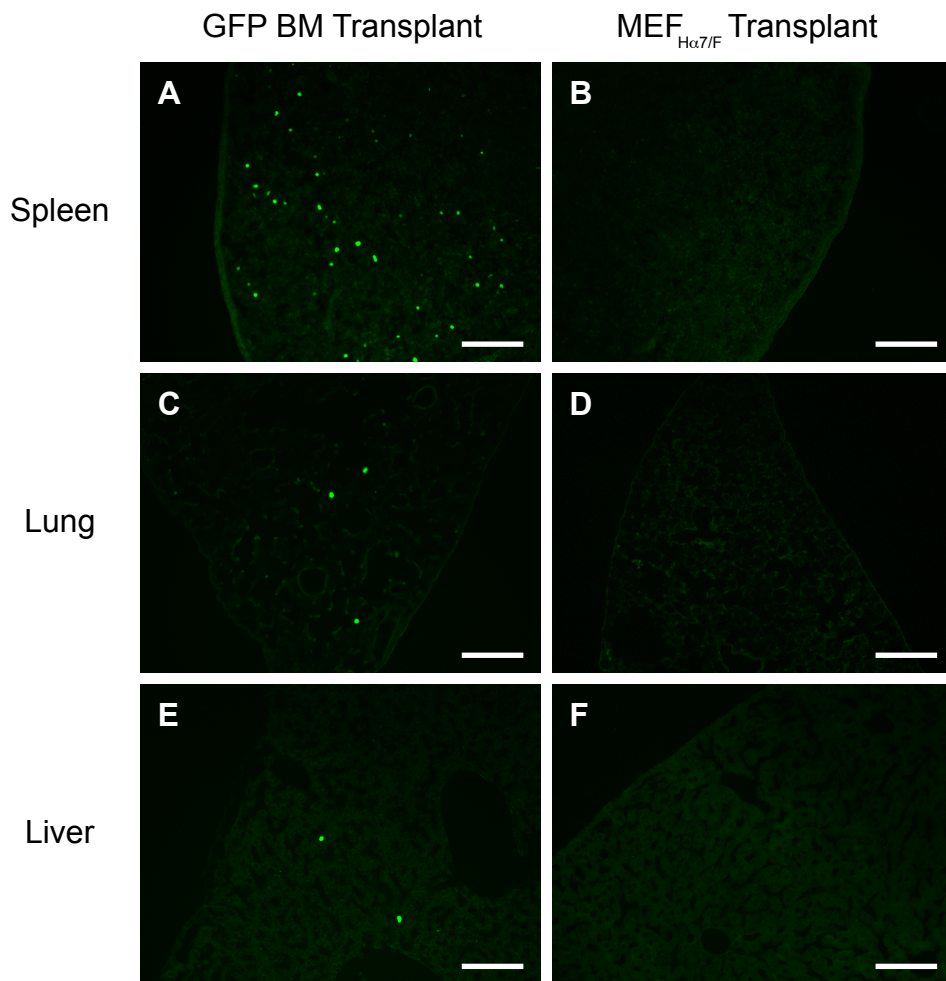

Supplement: pone.0026381.s002.pdf [file pone.0026381.s002.pdf]
