# Supplementary material for: Targeted Cell Fusion Facilitates Stable Heterokaryon Generation In Vitro and In Vivo
Source: PubMed Central journal article supplement (PMC3200330; doi:10.1371/journal.pone.0026381), 2011-10-24
Supplement: pone.0026381.s003.pdf [file pone.0026381.s003.pdf]

**Table S1.** Percentage of myotubes expressing GFP following H $\alpha$ 7-mediated fusion, PEG-mediated fusion or coculture of 293T<sub>GFP</sub> cells and differentiating C2C12 myotubes.

| Fusogen      | Days Post Fusion |             |             |
|--------------|------------------|-------------|-------------|
|              | Day 1            | Day 2       | Day 3       |
| H $\alpha$ 7 | 84 $\pm$ 14      | 96 $\pm$ 12 | 92 $\pm$ 11 |
| PEG          | 13 $\pm$ 5       | 11 $\pm$ 4  | 11 $\pm$ 7  |
| No Fusogen   | 0 $\pm$ 0        | 1 $\pm$ 1   | 2 $\pm$ 1   |
