# Supplementary material for: Targeted Cell Fusion Facilitates Stable Heterokaryon Generation In Vitro and In Vivo
Source: PubMed Central journal article supplement (PMC3200330; doi:10.1371/journal.pone.0026381), 2011-10-24
Supplement: pone.0026381.s004.pdf [file pone.0026381.s004.pdf]

**Table S2.** Fold increase in the number of GFP-positive myotubes observed following H $\alpha$ 7-mediated fusion of 293T<sub>GFP</sub> cells and differentiating C2C12 myotubes as compared to the number observed following PEG-mediated fusion.

| Days Post Fusion |            |             |
|------------------|------------|-------------|
| Day 1            | Day 2      | Day 3       |
| 12 $\pm$ 4       | 17 $\pm$ 6 | 16 $\pm$ 10 |
