# Supplementary material for: Targeted Cell Fusion Facilitates Stable Heterokaryon Generation In Vitro and In Vivo
Source: PubMed Central journal article supplement (PMC3200330; doi:10.1371/journal.pone.0026381), 2011-10-24
Supplement: pone.0026381.s005.pdf [file pone.0026381.s005.pdf]

**Table S3.** Fold increase in human MyoD and myogenin transcript levels detected following H $\alpha$ 7-mediated fusion of MRC-5 cells and differentiating C2C12 myotubes as compared to the levels detected following PEG-mediated fusion. (H $\alpha$ 7 signal/PEG signal)

|          | Days Post Fusion |         |         |         |         |        |       |       |
|----------|------------------|---------|---------|---------|---------|--------|-------|-------|
|          | Day 1            | Day 2   | Day 3   | Day 4   | Day 5   | Day 6  | Day 7 | Day 8 |
| MyoD     | NA <sup>a</sup>  | 43 ± 28 | 83 ± 27 | 94 ± 17 | 52 ± 12 | 32 ± 3 | 4 ± 2 | 9 ± 1 |
| Myogenin | 31 ± 13          | 11 ± 5  | 23 ± 16 | 12 ± 5  | 6 ± 2   | 12 ± 5 | 2 ± 1 | 9 ± 4 |

<sup>a</sup> No hMyoD signal was detected on Day 1 following PEG mediated fusion
